# Supplementary material
Source: HighWire-hosted journal article supplement (https://www.g3journal.org/content/suppl/2014/06/04/g3.114.011759)
Supplement: TableS2.pdf [file TableS2.pdf]

**Table S2** The number of splice junctions that are observed in infected samples but not in mock samples. Thresholds were set at 10 reads for infected samples and 5 reads for mock samples.

|              | <b>MA15</b>  |             | <b>PR8</b>   |              |
|--------------|--------------|-------------|--------------|--------------|
|              | <b>Day 2</b> | <b>Day4</b> | <b>Day 2</b> | <b>Day 4</b> |
| <b>129S1</b> | 2114         | 1868        | 2854         | 4504         |
| <b>AJ</b>    | 4615         | 1818        | 2674         | 788          |
| <b>B6</b>    | 2344         | 757         | 371          | 7877         |
| <b>CAST</b>  | 1487         | 2666        | 2078         | 3934         |
| <b>NOD</b>   | 2294         | 3173        | 1825         | 2496         |
| <b>NZO</b>   | 1844         | 2827        | 4353         | 3562         |
| <b>PWK</b>   | 4675         | 4093        | 429          | 2455         |
| <b>WSB</b>   | 2842         | 2377        | 6359         | 4616         |
